# Supplementary material for: Phylogenomic Analysis of Human Papillomavirus Type 31 and Cervical Carcinogenesis: A Study of 2093 Viral Genomes
Source: MDPI journal article supplement (doi:10.3390/v13101948), 2021-09-28
Supplement: s1 [file s1]

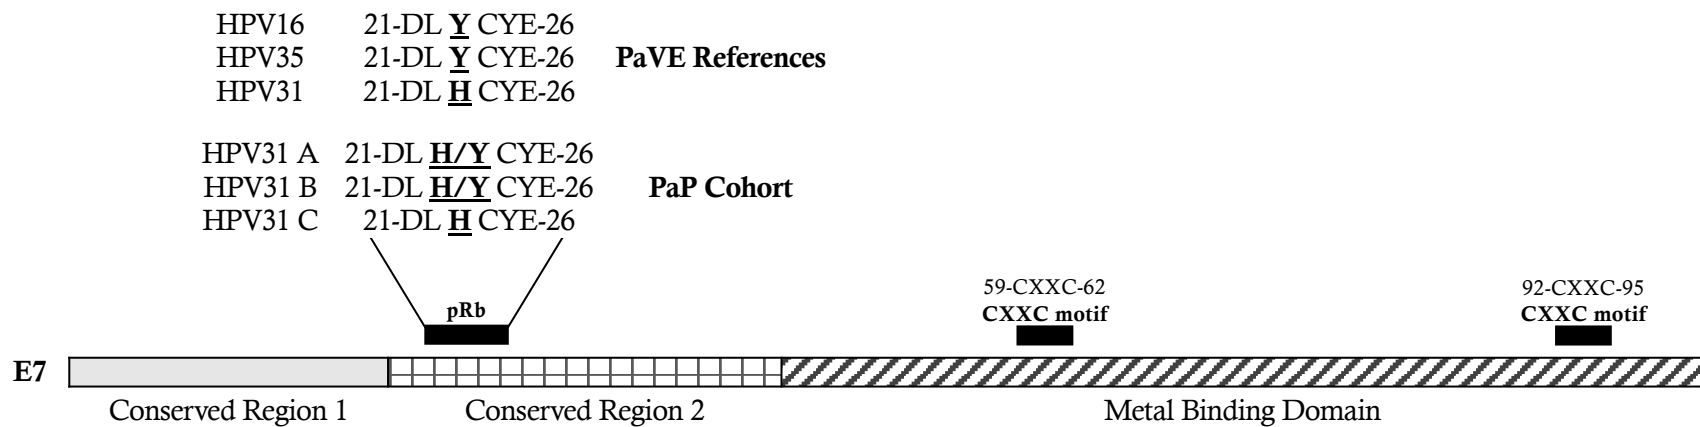

**Figure S2.** Amino-acid alignment with schematic representation of E7 structure and domains, with reference protein sequences from HPV16, 31 and 35 obtained from the Papillomavirus Episteme database (PaVE).
