# Supplementary material for: Phylogenomic Analysis of Human Papillomavirus Type 31 and Cervical Carcinogenesis: A Study of 2093 Viral Genomes
Source: Viruses. 2021 Sep 28;13(10):1948. doi: 10.3390/v13101948 (PMC8540939; doi:10.3390/v13101948)
Supplement: Supplementary file 1 [file viruses-13-01948-s001.zip › viruses-1359612 suppl.xlsx]

## Sheet: Table S1
Table S1. Genome references used to build phylogenetic tree and tp perform lineage assignment.
HPV type	Isolate ID	Lineage	GenBank ID
HPV31	Reference	A1	J04353.1
HPV31	Z14	A1	HQ537666
HPV31	QV18335	A1	HQ537667
HPV31	In453545	A1	HQ537668
HPV31	QV00215	A1	HQ537671
HPV31	QV00071	A1	HQ537669
HPV31	QV02784	A1	HQ537670
HPV31	QV02689	A1	HQ537672
HPV31	QV00168	A1	HQ537673
HPV31	In221709	A2	HQ537675
HPV31	QV14117	A2	HQ537674
HPV31	QV06582	B1	HQ537677
HPV31	QV03876	B1	HQ537676
HPV31	QV05335	B2	HQ537681
HPV31	QV17700	B2	HQ537680
HPV31	In231831	B2	HQ537679
HPV31	RW687	B2	HQ537678
HPV31	BF363	C1	HQ537683
HPV31	QV03136	C1	HQ537682
HPV31	QV14043	C2	HQ537684
HPV31	QV00693	C3	HQ537685
HPV31	QV12357	C3	HQ537687
HPV31	QV13734	C3	HQ537686
HPV31	PAP282436	C4	MT752407

## Sheet: Table S2
Table S2. Methylation assay primer sequences
Assay	Target CpG sites	Fwd Primer (5'-3')	Fwd Primer (bp)	Fwd Region	4bp Pad (Fwd)	3bp Pad (Fwd)	Total Length (Fwd)	Reverse Primer (5'- 3')	Rev primer (bp)	Rev Region	4bp Pad (Rev)	3bp Pad (Rev)	Total Length (Rev)	Total Amplicon size
L2	5518, 5521, 5524, 5530, 5564, 5572, 5622, 5639, 5659	ATGGGGGTGATTTTTATTTGTATT	24bp	5474-5497	GATC	CTG	39bp	AACCTACTATAAACAACCTAA	21 bp	5669- 5690	GCTG	TGC	36bp	247 bp
E2	3301, 3401, 3404, 3408, 3411, 3414, 3425	GTTAGGTAATTGTTTTTTTTGAATT	25bp	3261-3285	CTAG	ATG	40bp	ATTTCTATACTCTAACTCTATTCTTAA	27bp	3428-3454	AGTC	CTG	42bp	225 bp
L1	6283, 6305, 6351, 6363	TTTAAAATGGTTGTTGAGTTATAT	24bp	6280-6257	CATG	GCT	39bp	AAACCTTTAATATATAAATCAATAAA	26bp	6368-6393	GTGG	TGC	41bp	167 bp

## Sheet: Table S3
Table S3. Summary of sequencing coverage and quality statistics of the HPV next generation sequencing data.
Study	Mean	Standard Deviation	1st Qu.	Median	3rd Qu.
PaP Cohort, N=1577
Total number of covered bases ≥4x	7094	793.982	6830	7428	7547
genome covered with ≥4x	0.8958	0.100003	0.86	0.94	0.95
mean reads per amplicon	13211.2	19672.9	1758.5	7066.5	16458.2
Total number of reads	576636	845858	86557	313544	721793
IARC collection, N=516
Total number of covered bases ≥4x	7216	1120.05	7247	7632	7805
genome covered with ≥4x	0.9132	0.142228	0.92	0.96	0.99
mean reads per amplicon	17473.3	25749.1	3692.3	7997.4	20618.8
Total number of reads	779857	1.17522e+06	113564	349183	943424

## Sheet: Table S4
Table S4. Characteristics of HPV31-positive samples from the PaP cohort and IARC studies.
Study	Characteristics		N	%
PaP	Infection outcome	cancer	4	0.00253646
N=1,577		CIN3-AIS	246	0.155992
		CIN2	293	0.185796
		control	1034	0.655675
	Age at enrolment	21-29	223	0.141408
		30-39	701	0.444515
		40-49	382	0.242232
		50+	271	0.171845
	Race/ethnicity	White	767	0.486367
		Hispanic	363	0.230184
		African-American	110	0.0697527
		Asian	199	0.126189
		Multiple/Not available	138	0.0875079
	HPV type	31	1143	0.724794
		31 and other non-HPV16 infection	434	0.275206
IARC	Infection outcome	cancer	125	0.242248
N=516		control	334	0.647287
		HSIL/CIN2/3	54	0.104651
		unknown histology	3	0.00581395
	Age	16-29	199	0.385659
		30-39	107	0.207364
		40-49	105	0.203488
		50-59	57	0.110465
		60+	45	0.0872093
		no age	3	0.00581395
	Geographic region	Africa	153	0.296512
		Asia	203	0.393411
		Europe	41	0.0794574
		Latin America	90	0.174419
		Oceania	29	0.0562016
	HPV type	31	293	0.567829
		31 and other HPV infection	223	0.432171
Footnote: CIN2 = Cervical intraepithelial neoplasia (CIN) grade 2; CIN3= CIN grade 3; AIS = adenocarcinoma in situ; HSIL = High-grade squamous intraepithelial lesion.

## Sheet: Table S5
Table S5. IARC HPV31-positive sample collection by region/country, status and sublineage.
Region	Country	Status	A1	A2	B1	B2	C1	C2	C3	C4
Africa	Algeria	Cervical cancer					4
Africa	Algeria	Control1				1	6			2
Africa	Guinea	Cervical cancer						1
Africa	Guinea	Control1	2			1	8	1
Africa	Kenya	Cervical cancer				1	1
Africa	Mali	Cervical cancer					1
Africa	Morocco	Cervical cancer	3				2
Africa	Morocco	Control1					2
Africa	Nigeria	Cervical cancer					1
Africa	Nigeria	Control1	1				21
Africa	Rwanda	Cervical cancer	6			1	1
Africa	Rwanda	Control1	40	1		15	9		2
Africa	South-Africa	Cervical cancer				1
Africa	South-Africa	Control1				2	1
Asia, E	Bhutan	Cervical cancer				3
Asia, E	Bhutan	Control1	5	4	3	24		17
Asia, E	China	Control1		13	1	1		4
Asia, E	Korea	Cervical cancer		1
Asia, E	Korea	Control1		2
Asia, E	Mongolia	Cervical cancer	1					3	2
Asia, E	Mongolia	Control1	2	1	23	5		6	8	1
Asia, E	Philippines	Cervical cancer	2	1
Asia, E	Philippines	Control1		1
Asia, E	Thailand	Cervical cancer		10
Asia, E	Thailand	Control1		4		1
Asia, E	Vietnam	Control1	1	2
Asia, W-S	India	Cervical cancer						2
Asia, W-S	India	Control1	2		4	8		6	1
Asia, W-S	Iran	Cervical cancer	2				1
Asia, W-S	Iran	Control1			1	1
Asia, W-S	Nepal	Cervical cancer		1
Asia, W-S	Nepal	Control1			2
Europe	Georgia	Cervical cancer				1			1
Europe	Georgia	Control1			1	6			9
Europe	Poland	Cervical cancer				2		1
Europe	Poland	Control1				5		2		2
Europe	Spain	Cervical cancer	2		1				2
Europe	Spain	Control1			1	3
Latin American	Argentina	Cervical cancer				2				1
Latin American	Argentina	Control1	4		2	1			3	6
Latin American	Bolivia	Cervical cancer	7		4		1
Latin American	Brazil	Cervical cancer	7
Latin American	Chile	Cervical cancer			3	2				2
Latin American	Colombia	Cervical cancer	7
Latin American	Colombia	Control1	6	1	1
Latin American	Cuba	Cervical cancer	1
Latin American	Panama	Cervical cancer	1					1
Latin American	Paraguay	Cervical cancer	2							3
Latin American	Paraguay	Control1	2
Latin American	Peru	Cervical cancer	11	1	2
Latin American	Peru	Control1	2		1
Oceania	Fiji	Control1	1	2		3		2	2	2
Oceania	Vanuatu	Control1	3	1	1	6			3	1
1 "Control", "HSIL/CIN2/3" and "unknown histology" are included

## Sheet: Table S6
Table S6. HPV31 lineage/sublineage distribution among samples from the PaP Cohort and IARC.
	Status (PaP cohort)										Race/ethnicity (PaP cohort)										World Regions (IARC)
HPV31	Cancer		CIN3		CIN2		Control (≤CIN1)		Total	p*	White		Hispanic		African-American		Asian		Total⌘	p	Europe		Latin-America		Africa		Asia		Oceania		Total⌘	p*
	N	%	N	%	N	%	N	%	N		N	%	N	%	N	%	N	%	N		N	%	N	%	N	%	N	%	N	%	N
Lineage
A	3	0.75	100	0.406504	114	0.389078	326	0.31528	543		271	0.353325	122	0.336088	24	0.218182	68	0.341709	485		2	0.0487805	54	0.6	56	0.366013	64	0.315271	7	0.241379	183
B	0	0	58	0.235772	51	0.174061	187	0.180851	296		148	0.19296	69	0.190083	15	0.136364	35	0.175879	267	#	21	0.512195	18	0.2	27	0.176471	86	0.423645	11	0.37931	163
C	1	0.25	88	0.357724	128	0.43686	521	0.503868	738	0.0004998	348	0.453716	172	0.473829	71	0.645455	96	0.482412	687	0.02491	18	0.439024	18	0.2	70	0.457516	53	0.261084	11	0.37931	170	0.0004998
Sublineage
A1	2	0.5	76	0.308943	96	0.327645	267	0.258221	441		223	0.290743	102	0.280992	20	0.181818	47	0.236181	392		2	0.0487805	51	0.566667	55	0.359477	17	0.0837438	4	0.137931	129
A2	1	0.25	24	0.097561	18	0.0614334	59	0.05706	102		48	0.0625815	20	0.0550964	4	0.0363636	21	0.105528	93		0	0	3	0.0333333	1	0.00653595	47	0.231527	3	0.103448	54
B1	0	0	9	0.0365854	10	0.0341297	35	0.0338491	54		24	0.0312907	15	0.0413223	2	0.0181818	6	0.0301508	47		3	0.0731707	13	0.144444	0	0	42	0.206897	1	0.0344828	59
B2	0	0	49	0.199187	41	0.139932	152	0.147002	242		124	0.161669	54	0.14876	13	0.118182	29	0.145729	220		18	0.439024	5	0.0555556	27	0.176471	44	0.216749	10	0.344828	104
C1	0	0	6	0.0243902	16	0.0546075	58	0.0560928	80		38	0.0495437	17	0.046832	12	0.109091	7	0.0351759	74		0	0	1	0.0111111	63	0.411765	1	0.00492611	0	0	65
C2	0	0	4	0.0162602	11	0.0375427	37	0.0357834	52		23	0.029987	11	0.030303	1	0.00909091	10	0.0502513	45		3	0.0731707	1	0.0111111	3	0.0196078	39	0.192118	2	0.0689655	48
C3	0	0	55	0.223577	80	0.273038	322	0.311412	457		208	0.271186	110	0.30303	50	0.454545	59	0.296482	427	*	13	0.317073	3	0.0333333	2	0.0130719	12	0.0591133	6	0.206897	36
C4	1	0.25	23	0.0934959	21	0.0716724	104	0.10058	149	0.009995	79	0.102999	34	0.0936639	8	0.0727273	20	0.100503	141	0.01699	2	0.0487805	13	0.144444	2	0.0130719	1	0.00492611	3	0.103448	21	0.0004998
Footnote: ≤CIN1 = Cervical intraepithelial neoplasia (CIN) grade 1 or lower; CIN3+ = CIN grade 3 and cancer; p*= Fisher's exact test using Monte Carlo simulation; p# = Chi-square test. Significant p-values are bolded. ⌘For the PaP Cohort, 138 women were self-reported as multiple race/ethnicities or no race/ethnicity was available

## Sheet: Table S7
Table S7. HPV31 lineage associations with CIN2+, and effect modification of race/ethnicity, in the PaP cohort.
Lineages Race/Ethnicity	≤CIN1 Controls, N	%	CIN2+ Cases, N	%	OR	95% CI		p
Lineage
C	521	0.503868	217	0.399632	ref
A	326	0.31528	217	0.399632	1.59816	1.26525	2.01867
B	187	0.180851	109	0.200737	1.39947	1.05309	1.85977
Total	1034		543
Sublineage
C3	322	0.311412	135	0.248619	ref
A1	267	0.258221	174	0.320442	1.55439	1.17806	2.05095
A2	59	0.05706	43	0.0791897	1.73836	1.118	2.70293
B1	35	0.0338491	19	0.0349908	1.29481	0.715195	2.34418
B2	152	0.147002	90	0.165746	1.41228	1.01618	1.96277
C1	58	0.0560928	22	0.0405157	0.904725	0.532361	1.53754
C2	37	0.0357834	15	0.0276243	0.966967	0.513612	1.82049
C4	104	0.10058	45	0.0828729	1.03205	0.689494	1.5448
Total	1034		543
A
White	143	0.503521	128	0.636816	1.7289	1.19447	2.50246
Hispanic	81	0.285211	41	0.20398	0.642207	0.418174	0.986263
African-American	18	0.0633803	6	0.0298507	0.454701	0.177223	1.16662
Asian	42	0.147887	26	0.129353	0.856054	0.505724	1.44907	0.00141451
Total	284		201
B
White	90	0.54878	58	0.563107	1.05975	0.645234	1.74057
Hispanic	42	0.256098	27	0.262136	1.03195	0.588322	1.81012
African-American	11	0.0670732	4	0.038835	0.561983	0.174079	1.81426
Asian	21	0.128049	14	0.135922	1.07116	0.518176	2.21428	0.794713
Total	164		103
C
White	237	0.489669	111	0.546798	1.25743	0.905062	1.74699
Hispanic	132	0.272727	40	0.197044	0.654397	0.438864	0.97578
African-American	51	0.105372	20	0.0985222	0.92789	0.537914	1.60059
Asian	64	0.132231	32	0.157635	1.22807	0.775194	1.94552	0.0711139
Total	484		203
Footnote: ≤CIN1 = Cervical intraepithelial neoplasia (CIN) grade 1 or lower; CIN2+ = CIN grade 2, grade 3 and cancer; OR = Odds ratio and 95% confidence intervals (CI) from logistic regression; For race/ethnicity, the reference group is all other races combined but the tested group. A total of 138 women did not report race/ethnicity or reported as from multiple races. p=Wald-test for heterogeneit…

## Sheet: Table S8
Table S8. Associations between CIN3+ and individual SNPs in the PaP cohort.
Genome position	Gene region	MAF	Total N	No. A	No. T	No. C	No. G	OR	95% CI		p	p-FDR	nucleotide	Frequency of SNP within lineage/sublineage#	Effect	Type	TriNC	AA Change
7449	URR	0.394118	170	103	0	0	67	4.76812	2.02409	11.2322	0.000352965	0.00260148	G	97.0% A	NON_CODING
7394	URR	0.373134	201	126	0	75	0	4.21818	1.85015	9.6171	0.000618771	0.00397211	C	97.0% A	NON_CODING
7372	URR	0.384977	213	0	0	131	82	3.75597	1.78395	7.90791	0.000494327	0.00339211	G	96.3% A	NON_CODING
7384	URR	0.318841	207	141	0	15	51	3.65217	1.72555	7.72992	0.000708885	0.00427479	C/G	(C) 100.0% A2; (G) 90.2% A1	NON_CODING
4665	L2	0.334125	1263	841	0	0	422	1.61677	1.21616	2.14935	0.0009426	0.00521048	G	95% A	SYNONYMOUS_CODING	SILENT	caG/caA	Q165
5921	L1	0.321116	1255	0	403	852	0	1.6092	1.20635	2.14657	0.00121168	0.00651687	T	99.8% A	SYNONYMOUS_CODING	SILENT	Tta/Cta	L124
626	E7	0.215457	1281	0	276	1005	0	1.5982	1.16684	2.18902	0.00348472	0.014957	T	96.4% A2 and B2	NON_SYNONYMOUS_CODING	MISSENSE	Cac/Tac	H23Y
4899	L2	0.33629	1240	823	0	0	417	1.57281	1.1782	2.09957	0.00212139	0.0100514	G	94.2% A	SYNONYMOUS_CODING	SILENT	caG/caA	Q243
7525	URR	0.333333	1134	756	0	0	378	1.56351	1.15617	2.11436	0.00370387	0.014957	G	93.7% A	NON_CODING
1359	E1	0.334112	1284	20	7	855	402	1.55263	1.1632	2.07245	0.00375803	0.014957	G*	98.5% A	NON_SYNONYMOUS_CODING	MISSENSE	gaG/gaC	E166D
7575	URR	0.324154	1271	0	412	859	0	1.51949	1.14026	2.02485	0.00428983	0.0155214	T	99.3% A	NON_CODING
670	E7	0.325781	1280	0	863	417	0	1.49947	1.12702	1.99502	0.00542283	0.0189323	C*	97.1% A	SYNONYMOUS_CODING	SILENT	gtC/gtT	V37
6372	L1	0.343393	1226	805	0	421	0	1.49922	1.12345	2.00068	0.00594721	0.0204051	C	95.7% A	NON_SYNONYMOUS_CODING	MISSENSE	aCt/aAt	T274N
320	E6	0.338052	1201	394	795	0	12	1.49422	1.11438	2.00352	0.00661314	0.0212261	A	91.6% A	SYNONYMOUS_CODING	SILENT	tcA/tcT	S71
5121	L2	0.325139	1261	851	0	0	410	1.49199	1.11865	1.98991	0.00646673	0.0212261	G	0.959036	SYNONYMOUS_CODING	SILENT	gtG/gtA	V317
6796	L1	0.338798	1281	847	0	0	434	1.4818	1.11571	1.96802	0.00660253	0.0212261	G	97.% A	SYNONYMOUS_CODING	SILENT	ttG/ttA	L415
520	E6	0.328616	1272	0	854	418	0	1.46841	1.10262	1.95555	0.00858094	0.0262709	C*	96.9% A	SYNONYMOUS_CODING	SILENT	gtC/gtT	V272
4999	L2	0.435237	1243	0	541	702	0	0.643326	0.479975	0.862271	0.0031618	0.0143	T*	94.1% C2, C3 and C4	SYNONYMOUS_CODING	SILENT	Cta/Tta	L277
2274	E1	0.444905	1207	5	670	1	531	0.636782	0.473564	0.856254	0.00364127	0.014957	G	98.7% C1, C3 and C4	NON_SYNONYMOUS_CODING	MISSENSE	atT/atG	I471M
7659	URR	0.296887	1253	0	881	0	372	0.635254	0.457433	0.882202	0.00676797	0.0213782	G	99.2% C3	NON_CODING
4329	L2	0.378947	1235	0	767	0	468	0.60842	0.448261	0.825802	0.00143253	0.00712682	G	99.6% C	SYNONYMOUS_CODING	SILENT	gtT/gtG	V53
5920	L1	0.294821	1255	885	0	0	370	0.60346	0.433021	0.840985	0.00285694	0.0132217	G	99.5% C3	SYNONYMOUS_CODING	SILENT	ttatta/ttGCta	LL123
285	E6	0.454844	1218	0	554	664	0	0.603446	0.450676	0.808002	0.000695223	0.00427479	T	96% C	NON_SYNONYMOUS_CODING	MISSENSE	Cac/Tac	H60Y
1236	E1	0.456504	1253	0	564	681	8	0.600485	0.449009	0.803063	0.000517097	0.00343008	T*	97.0% C	SYNONYMOUS_CODING	SILENT	ctC/ctT	L125
404	E6	0.464663	1231	572	0	0	659	0.596222	0.446097	0.796868	0.000475398	0.00337872	A	98.3% C	SYNONYMOUS_CODING	SILENT	ttG/ttA	L99
5299	L2	0.474259	1282	0	607	1	674	0.594657	0.44763	0.789976	0.000334607	0.00260148	T	97.4% C	NON_SYNONYMOUS_CODING	MISSENSE	Gta/Tta	V377L
6586	L1	0.480469	1280	0	665	0	615	0.593647	0.446955	0.788486	0.000316935	0.00260148	G	96.9% C	SYNONYMOUS_CODING	SILENT	gtT/gtG	V345
6350	L1	0.45789	1223	663	0	0	560	0.586486	0.437695	0.785856	0.000351443	0.00260148	G	99.8% C	NON_SYNONYMOUS_CODING	MISSENSE	Acg/Gcg	T267A
1791	E1	0.467654	1283	0	600	683	0	0.576838	0.433527	0.767525	0.000159544	0.00167101	T	98.8% C	SYNONYMOUS_CODING	SILENT	agC/agT	S310
6085	L1	0.494382	890	0	440	450	0	0.575452	0.415043	0.797856	0.000917986	0.00521048	T	98.6% C	SYNONYMOUS_CODING	SILENT	aaC/aaT	N178
6328	L1	0.462295	1220	564	0	0	656	0.573574	0.428031	0.768605	0.000197361	0.00188301	A	99.8% C	SYNONYMOUS_CODING	SILENT	agG/agA	R259
580	E7	0.494154	1283	634	0	0	649	0.573553	0.432356	0.760861	0.000115484	0.00147632	A	93.8% C	SYNONYMOUS_CODING	SILENT	acG/acA	T7
1743	E1	0.465316	1283	0	597	686	0	0.571294	0.429111	0.760589	0.000125972	0.00147632	T	99.3% C	SYNONYMOUS_CODING	SILENT	agC/agT	S294
1934	E1	0.475819	1282	672	0	0	610	0.570401	0.428814	0.758737	0.000114931	0.00147632	G	98.0% C	NON_SYNONYMOUS_CODING	MISSENSE	aAa/aGa	K358R
4359	L2	0.47451	1275	605	0	670	0	0.566302	0.425319	0.754018	9.9e-05	0.00147632	A	97.5% C	SYNONYMOUS_CODING	SILENT	ggC/ggA	G63
7642	URR	0.4896	1250	612	0	638	0	0.565688	0.42459	0.753675	9.95e-05	0.00147632	A	98.7% C	NON_CODING
7533	URR	0.475728	1133	0	594	539	0	0.565204	0.417128	0.765846	0.000232179	0.00200885	C	97.4% C	NON_CODING
4513	L2	0.480469	1280	615	0	0	665	0.564465	0.424659	0.750298	8.2e-05	0.00147632	A	98.7% C	NON_SYNONYMOUS_CODING	MISSENSE	Gtt/Att	V115I
7515	URR	0.476569	1131	539	0	592	0	0.562714	0.415264	0.762519	0.000208172	0.00188301	A	97.2% C	NON_CODING
3044	E2	0.491364	1158	3	0	566	589	0.561478	0.41665	0.756649	0.000126118	0.00147632	C*	98.2% C	NON_SYNONYMOUS_CODING	MISSENSE	Gag/Cag	E118Q
3980	E5	0.472536	1238	585	653	0	0	0.56129	0.419799	0.750471	9.74e-05	0.00147632	A	99.5% C	SYNONYMOUS_CODING	SILENT	tcT/tcA	S55
7749	URR	0.482436	1281	663	0	618	0	0.559032	0.42058	0.743061	6.19e-05	0.00147632	C	98.1% C	NON_CODING
963	E1	0.477612	1273	0	0	608	665	0.557524	0.418704	0.74237	6.36e-05	0.00147632	C	99.5% C	NON_SYNONYMOUS_CODING	MISSENSE	gaG/gaC	E34D
1689	E1	0.487941	1078	552	0	0	526	0.556778	0.408912	0.758113	0.000200461	0.00188301	G	99.4% C	SYNONYMOUS_CODING	SILENT	aaA/aaG	K276
7151	URR	0.472289	830	392	0	0	438	0.555435	0.394597	0.781831	0.000749238	0.00438525	G	97.5% C	NON_CODING
3957	E5	0.478646	1241	647	0	1	593	0.553127	0.414062	0.738897	5.77e-05	0.00147632	G	99.5% C	NON_SYNONYMOUS_CODING	MISSENSE	Att/Gtt	I48V
4980	L2	0.47915	1223	637	1	0	585	0.550832	0.410574	0.739004	6.97e-05	0.00147632	G	98.5% C	NON_SYNONYMOUS_CODING	MISSENSE	atA/atG	I270M
3827	E5	0.395329	1199	725	1	2	471	0.549844	0.402953	0.750282	0.000133605	0.00147708	G	99.4% C	SYNONYMOUS_CODING	SILENT	ctA/ctG	L4
6019	L1	0.480031	1277	664	0	0	613	0.546557	0.410606	0.72752	3.47e-05	0.00147632	G	98.4% C	SYNONYMOUS_CODING	SILENT	caA/caG	Q156
5427	L2	0.474922	1276	0	606	670	0	0.544241	0.40872	0.724697	3.13e-05	0.00147632	T	98.3% C	SYNONYMOUS_CODING	SILENT	ttC/ttT	F419
4632	L2	0.464654	1259	674	0	2	583	0.543852	0.406836	0.727014	4.9e-05	0.00147632	G	98.3% C	SYNONYMOUS_CODING	SILENT	gaA/gaG	E154
5581	L1	0.480632	1265	608	657	0	0	0.5371	0.403049	0.715734	2.21e-05	0.00147632	A	98.7% C	SYNONYMOUS_CODING	SILENT	acT/acA	T10
4644	L2	0.474186	1259	0	662	597	0	0.535221	0.401004	0.714359	2.2e-05	0.00147632	C	98.5% C	SYNONYMOUS_CODING	SILENT	ttT/ttC	F158
2136	E1	0.164791	1244	0	1039	205	0	0.517045	0.331659	0.806057	0.00359463	0.014957	C	99% C3	SYNONYMOUS_CODING	SILENT	ttT/ttC	F425
7369	URR	0.405797	207	0	123	84	0	0.196203	0.072677	0.529678	0.00130818	0.00667508	C	100% C	NON_CODING
7305	URR	0.49359	156	0	79	77	0	0.191799	0.0681448	0.539833	0.00176191	0.0085517	C	100% C	NON_CODING
7383	URR	0.379808	208	129	0	79	0	0.168602	0.0570387	0.498376	0.00128462	0.00667508	C	100% C	NON_CODING
Footnote: NC = nucleotide; AA = amino-acid; TriNC = trinucleotide within a codon which SNPs is located; *variants potentially induced by APOBEC with motifs 5'[T] [C→T or C→G] [A or T]3'; #Frequency of each SNP within a particular lineage; OR = Odds ratio and 95% confidence intervals (CI) from logistic regression; p-FDR = False discovery rate (FDR) correction was performed for the number of common…

## Sheet: Table S9
Table S9. Non-synonymous over synonymous mutation rate by HPV gene region in PaP cohort.
HPV31 PaP	dN/dS	Z_value	significance	p
E1	0.118116	-3.31533	***	0.00091535
E2	0.349637	-1.62406		0.104363
E4	1.43034	0.835893		0.403217
E5	0.377424	-1.2676		0.204941
E6	0.256447	-1.54105		0.123305
E7	0.279302	-1.04864		0.294344
L1	0.059835	-4.16714	***	3.08445e-05
L2	0.154392	-3.25669	***	0.0011272
Footnote. Analyses performed with SNPgenie (Nelson and Hughes, 2015 [https://github.com/chasewnelson/SNPGenie]). Significant p-values are bolded.

## Sheet: Table S10
Table S10. Comparison of methylation levels across HPV31 lineages.
	Median % methylation by lineage			A vs. B		A vs. C		C vs. B
Status	A (N=55)	B (N=41)	C (N=79)	Difference	p*	Difference	p*	Difference	p*
controls	5.135	7.855	6.09	2.72	0.02771	0.955	0.1118	1.765	0.1834
CIN3+	14.59	17.525	14.21	2.935	0.001066	0.38	0.5999	3.315	0.0002473
p* = Mann-Whitney (Wilcoxon Rank Sum) p-value. Significant p-values are bolded.

[truncated: 1 more sheets: Table S11]
